# Supplementary material for: Evaluation of a deep-learning segmentation model for patients with colorectal cancer liver metastases (COALA) in the radiological workflow
Source: Springer Nature journal article supplement (doi:10.1186/s13244-025-01984-w), 2025-05-23
Supplement: MOESM1 [file 13244_2025_1984_MOESM1_ESM.pdf]

# **Evaluation of a deep-learning segmentation model for patients with colorectal cancer liver metastases (COALA) in the radiological workflow**

## **ELECTRONIC SUPPLEMENTARY MATERIAL**

### **Supplement S1 – Instruction for accessing and viewing the segmentation in PACS**

**Step 1:** Read all the questions of the questionnaire carefully.

**Step 2:** Find the study patient in PACS, and open CT scan(s).

**Step 3:** Click right mouse, choose 'Overlay' and subsequently choose the segmentation mask next to the corresponding CT scan.

**Step 4:** By double clicking both left and right mouse, the opacity of the segmentation mask can be adjusted.

**Step 5:** Assess the scan(s) as if it is a clinical patient, and assess accuracy of segmentation.

**Step 6:** Fill out the questionnaire.

## Supplement S2 – Questionnaire

1. Overall, the automatic segmentation of the colorectal liver metastases is accurate
  - 1) Strongly disagree
  - 2) Disagree
  - 3) Neither agree nor disagree
  - 4) Agree
  - 5) Strongly agree
2. The borders of the automatic segmentations are clearly defined
  - 1) Strongly disagree
  - 2) Disagree
  - 3) Neither agree nor disagree
  - 4) Agree
  - 5) Strongly agree
3. In complex cases (e.g. multiple or confluent) colorectal liver metastases, the automatic segmentation is accurate
  - 1) Strongly disagree
  - 2) Disagree
  - 3) Neither agree nor disagree
  - 4) Agree
  - 5) Strongly agree
4. Small colorectal liver metastases are detected effectively
  - 1) Strongly disagree
  - 2) Disagree
  - 3) Neither agree nor disagree
  - 4) Agree
  - 5) Strongly agree
5. The automatic segmentation model integrates seamlessly in my daily workflow
  - 1) Strongly disagree
  - 2) Disagree
  - 3) Neither agree nor disagree
  - 4) Agree
  - 5) Strongly agree
6. I would feel confident in using the automatic segmentation model for clinical decision-making
  - 1) Strongly disagree
  - 2) Disagree
  - 3) Neither agree nor disagree
  - 4) Agree
  - 5) Strongly agree
7. It is easy to simultaneously evaluate the scans before and after systemic therapy when using the automatic segmentation model
  - 1) Strongly disagree
  - 2) Disagree
  - 3) Neither agree nor disagree
  - 4) Agree
  - 5) Strongly agree
8. Open field (for general remarks)
